# Supplementary material for: Agro-Based Spent Mushroom Compost Substrates Improve Soil Properties and Microbial Diversity in Greenhouse Tomatoes
Source: Preprints.org preprint supplement (doi:10.20944/preprints202307.1215.v1), 2023-07-18
Supplement: Supplementary file 1 [file supplementary]

**Supplementary materials**


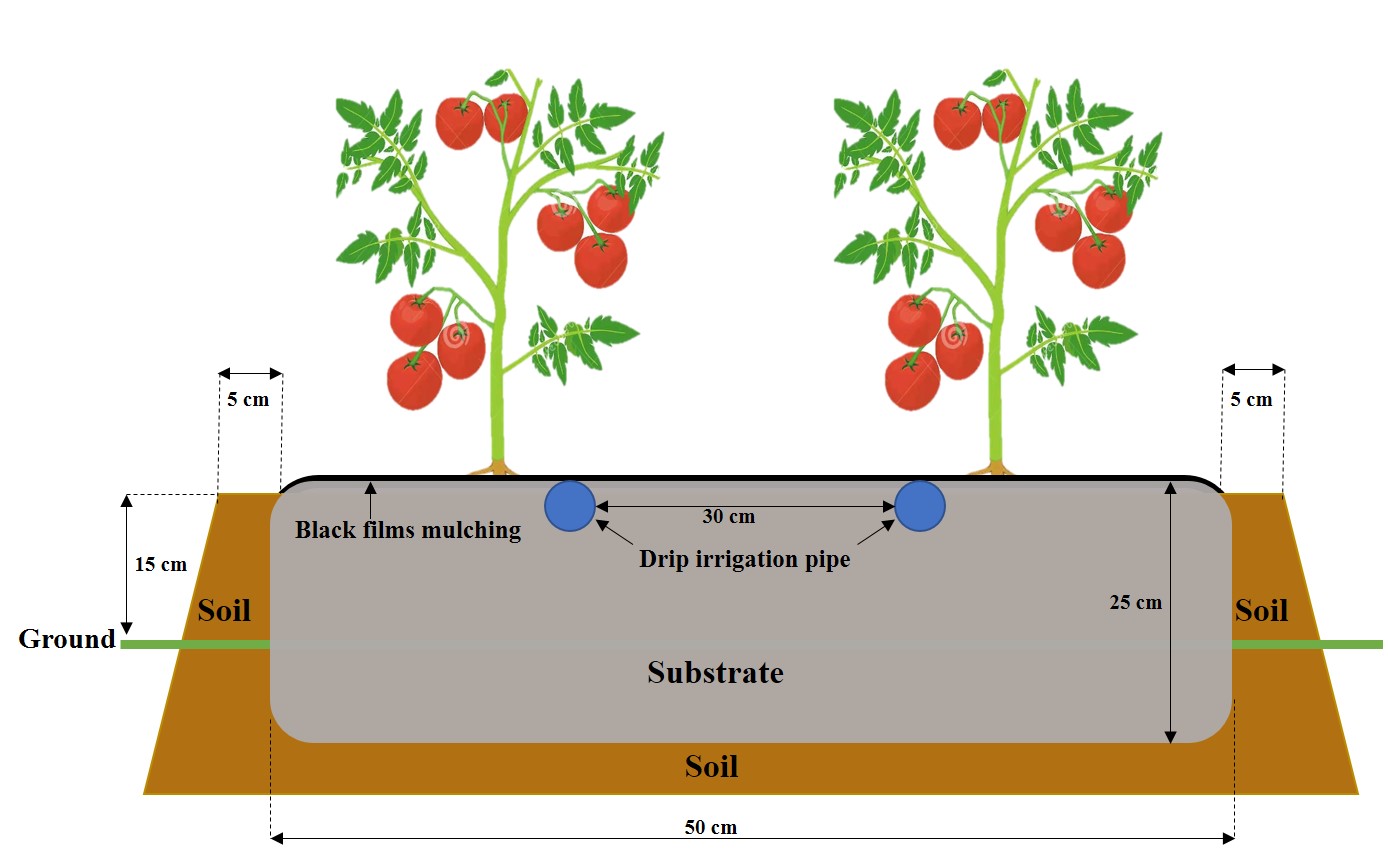


Fig.S1 Schematic of SMC substrate cultivation of greenhouse tomatoes.


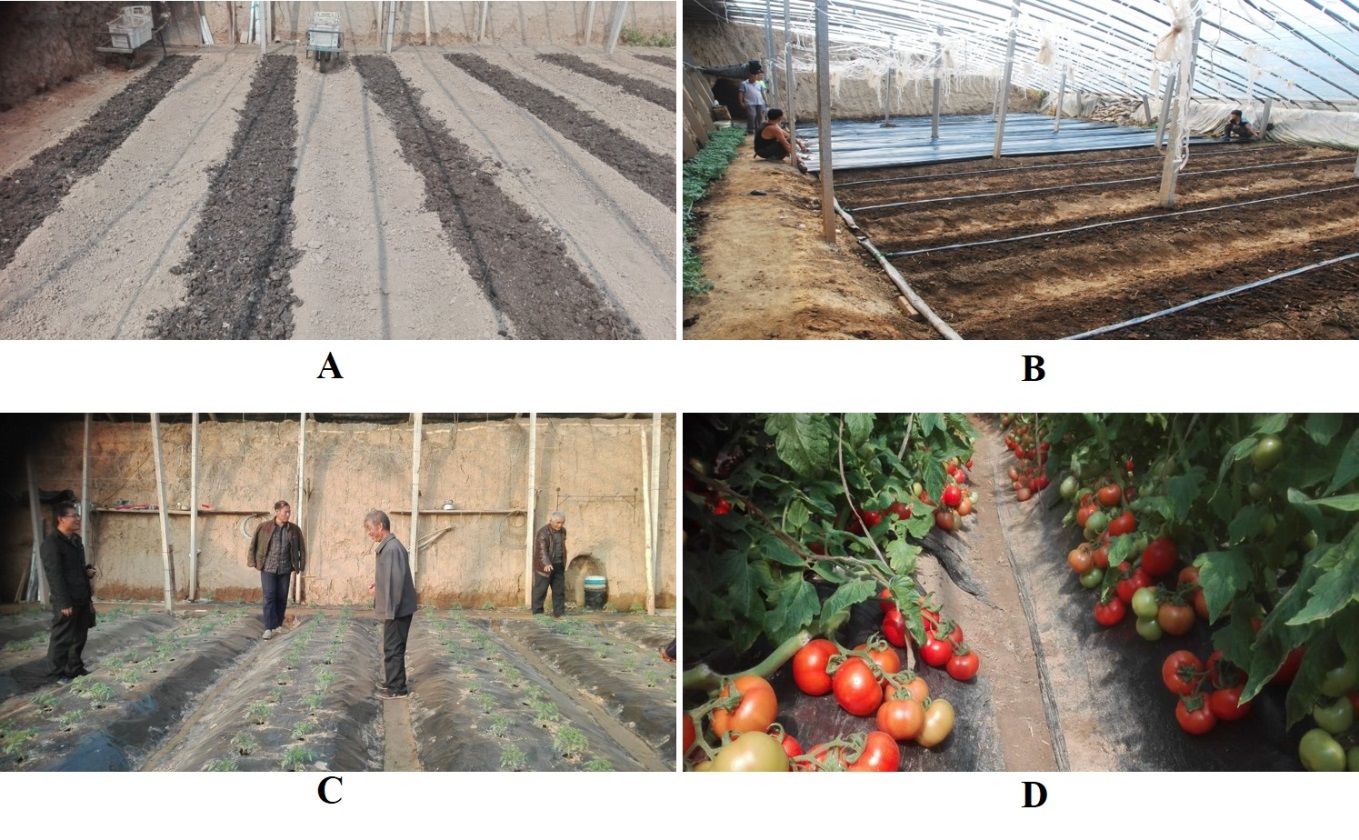


Fig.S2 Photographs of main SMC substrate cultivation processes in greenhouse.

(A) Soil preparation and substrate stuffing, (B) Laying of drip irrigation pipe and black film mulching, (C) Seedling stage, (D) Harvesting period.


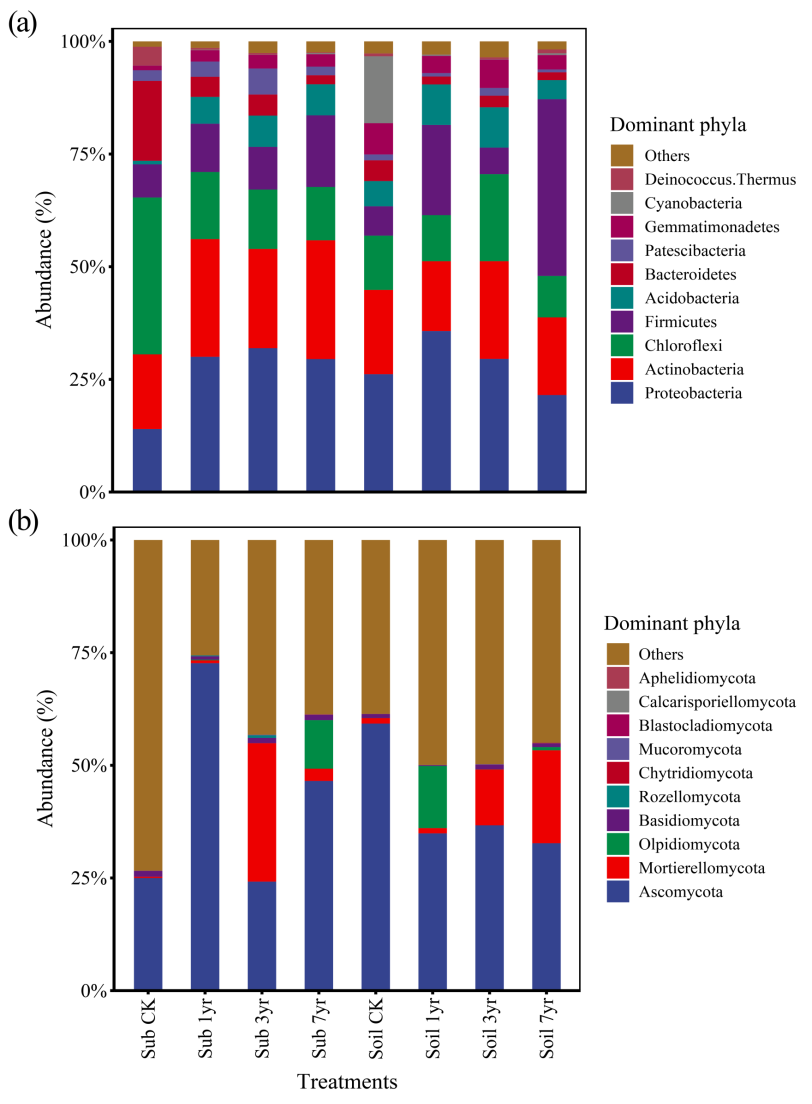


Fig.S3 Bacterial (a) and fungal (b) community composition at the phyla level. See table S1 for the abbreviations of different cultivation duration of the substrate and the surrounding soil.

Table S1 The treatments and abbreviations of different cultivation duration of the substrate and the surrounding soil

| **Abbr.** | **Treatments** |
| --- | --- |
| Sub CK | Substrate after fermented and composted but no planting in the testing greenhouse |
| Sub 1yr | Substrate after planting 1year in the testing greenhouse |
| Sub 3yr | Substrate after planting 3 years in the testing greenhouse |
| Sub 7yr | Substrate after planting 7 years in the testing greenhouse |
| Soil CK | continuous mono-cropping soil in the testing greenhouse |
| Soil 1yr | Surrounding soil of 1-yr substrate in the testing greenhouse |
| Soil 3yr | Surrounding soil of 3-yr substrate in the testing greenhouse |
| Soil 7yr | Surrounding soil of 7-yr substrate in the testing greenhouse |
